# Supplementary material for: Multivariate statistical evaluation of dissolved heavy metals and a water quality assessment in the Lake Aha watershed, Southwest China
Source: PeerJ journal article supplement (doi:10.7717/peerj.9660), 2020-08-12
Supplement: Supplemental_Rawdata_S1.xlsx [file Supplemental_Rawdata_S1.xlsx]

## Sheet: Youyu River
Sample Id	Date	pH	DO	EC	Mn	Co	Al	Ni	Ba	V	Sb	Fe	Sr
	(m-d-y)		mg/L	μS/cm	μg/L	μg/L	μg/L	μg/L	μg/L	μg/L	μg/L	μg/L	μg/L
YR-1	2017-11-09	7.293	9.57	1238	0.209268	0.0680308	1.2812	0.710896	13.4986	0.380097	9.10717	30.272	666.975
	2017-12-09	7.312	8.04	1233	0.467519	0.0678019	1.0758	0.882514	14.8025	0.338482	1.23476	31.5552	674.444
	2018-01-09	6.74	6.64	1205	0.306424	0.0540434	0.910874	1.73024	15.0472	0.0134239	0.839694	74.8023	554.624
	2018-02-09	6.71	7.2	199.4	0.168859	0.0457053	1.07165	1.31244	18.7765	0.00863527	0.495702	88.0395	508.657
	2018-03-09	7.6	4.59	512.8	0.578687	0.123546	9.68796	1.18826	12.4681	0.0758253	0.785309	33.0713	544.91
	2018-04-09	7.06	7.85	1147	25.9072	0.0707258	1.96592	4.69299	19.9459	0.0218408	0.741587	89.8129	512.894
YR-2	2017-11-08	7.959	11.37	573	0.160733	0.0384565	1.29223	2.28943	17.272	0.285582	1.05034	30.5361	384.134
	2017-12-08	8.051	12.92	550	0.744121	0.0799326	2.38075	2.7388	20.1454	0.286481	1.05346	43.8403	394.693
	2018-01-08	7.44	11.01	580.5	0.107235	0.067783	2.70276	0.712178	22.8576	0.343603	1.25959	38.8284	801.239
	2018-02-08	7.48	11.66	599.6	0.0775326	0.0650006	1.92121	0.614848	20.9861	0.320749	0.945162	39.7763	313.881
	2018-03-08	8.02	17.66	584.8	0.335527	0.10642	2.28944	0.820263	15.3959	0.50402	0.88448	36.1745	727.414
	2018-04-08	7.78	18.64	592.3	1.44734	0.0564893	3.00003	0.911273	14.5874	0.365363	0.58261	28.9097	549.998
YR-3	2017-11-07	7.197	5.96	567	0.810543	0.0973292	2.45276	2.27879	21.4755	0.026746	0.816033	33.7577	335.433
	2017-12-07	7.128	4.58	572	0.948695	0.0798159	3.19208	1.57726	27.7899	0.0276453	1.25337	40.2213	370.494
	2018-01-07	7.06	3.37	580.7	0.24676	0.035881	1.71525	0.575675	17.2719	0.252243	0.276238	37.9106	395.011
	2018-02-07	6.78	2.26	606.5	0.12474	0.038646	2.08178	0.700604	18.0301	0.305698	0.812296	47.157	408.585
	2018-03-07	6.84	4.47	662.6	0.32151	0.0451003	1.73185	0.72721	18.5252	0.240257	0.141537	54.7077	465.047
	2018-04-07	6.79	6.18	595.1	13.8713	0.0353677	1.70007	0.574494	18.0708	0.224908	0.800893	45.3736	413.571
YR-4	2017-11-06	8.018	9.85	576	110.935	2.09109	40.3975	7.65918	28.0948	0.032306	1.1455	37.3028	567.248
	2017-12-06	7.957	10.51	592	137.771	2.34926	31.3905	9.23205	25.3701	0.0228026	1.03298	38.3198	574.525
	2018-01-06	7.84	10.42	563.9	12.1934	0.115859	3.3604	1.03446	20.783	0.0196751	0.262787	34.6531	519.003
	2018-02-06	7.63	9.56	568.1	0.852393	0.0524481	4.50275	1.07589	20.7702	0.0136701	0.937254	39.9591	359.053
	2018-03-06	7.97	10.09	540.6	0.730067	0.0658221	2.55196	1.63724	17.4599	0.0427803	1.02748	32.754	447.755
	2018-04-06	7.78	10.48	353.5	14.1015	0.0981723	6.88834	0.97628	21.2899	0.0493239	0.925332	37.8734	332.328
YR-5	2017-11-05	7.62	9.78	557	0.140046	0.0437832	11.074	2.22861	19.1628	0.03807	1.26127	44.0161	404.657
	2017-12-05	7.641	10.56	567	0.0609978	0.0284728	9.98302	0.669163	13.4663	0.0291902	0.397431	31.7763	745.471
	2018-01-05	7.44	10.58	535.8	104.781	1.55185	90.3429	6.17852	14.6499	0.0356588	0.312919	59.424	573.203
	2018-02-05	6.95	9.55	354.1	145.261	2.01669	167.084	9.29241	13.8513	0.0345656	0.367253	116.117	577.442
	2018-03-05	7.89	9.98	496.5	68.7034	0.725823	51.656	2.88904	21.9926	0.0569159	0.146935	45.2344	312.282
		-	-	-	-	-	-	-	-	-	-	-	-
YR-6	2017-11-03	8.21	9.92	1215	0.947634	0.0603374	3.87743	2.85018	20.2251	0.0283375	4.63145	71.7777	479.483
	2017-12-03	8.247	10.74	1041	13.0565	0.0651542	27.3979	6.20962	17.1398	0.0410724	1.49132	57.8423	462.861
	2018-01-04	8.04	10.72	930.5	28.1291	0.474347	36.5421	3.92806	16.5829	0.0669595	0.261475	68.0499	470.302
	2018-02-03	7.83	9.95	742.9	0.152114	0.0396069	21.7556	1.13399	21.6389	0.0313684	0.82596	38.3435	350.008
	2018-03-03	7.59	10.22	1186	26.1872	0.404574	129.629	2.80006	15.6741	0.0878809	1.18209	37.1655	518.932
	2018-04-04	8.04	10.16	592.1	0.732977	0.0460719	21.0764	1.21974	18.9682	0.0541174	0.464108	38.7128	819.856
YR-7	2017-11-04	8.182	10.07	732	0.13793	0.067181	14.9395	5.10738	17.4134	0.0548775	1.55789	83.7072	749.037
	2017-12-04	8.619	10.96	700	0.172088	0.0397135	15.1983	3.06037	17.4949	0.0534465	1.40837	45.0379	919.915
	2018-01-03	7.88	10.9	645.6	20.968	0.214945	30.4783	1.83243	19.4889	0.0368271	0.262568	44.3716	361.233
	2018-02-04	7.97	9.65	601.5	0.00478817	0.0529045	33.8803	1.8034	16.1997	0.0626089	1.17285	51.2217	782.824
		-	-	-	-	-	-	-	-	-	-	-	-
	2018-04-03	7.7	10.05	946.7	75.6997	0.459283	17.0844	4.8352	13.9827	0.0451356	0.474745	61.4513	378.515
YR-8	2017-11-02	7.986	9.5	1075	0.263656	0.0511091	2.6573	1.99924	33.4304	0.457778	1.67083	37.2688	637.54
	2017-12-02	7.993	10.35	1057	0.0671171	0.0316715	1.61425	1.68712	27.2487	0.217892	0.669352	45.8815	660.414
	2018-01-02	7.64	10.29	964	0.97256	0.0573052	11.5183	4.19012	15.3844	0.0264846	0.308323	63.5968	923.932
	2018-02-02	7.79	9.21	1012	0.0634346	0.0619278	10.7396	3.19271	18.7259	0.0188691	0.886945	70.682	437.537
	2018-03-02	8.01	9.82	761.5	1.40455	0.0735798	15.4302	1.10507	19.2479	0.0456552	1.11098	52.9045	345.212
	2018-04-02	8.06	9.59	679.8	3.46338	0.0446517	13.1588	2.47631	14.9899	0.0498881	0.573827	39.2773	707.264
YR-9	2017-11-01	7.602	7.39	1437	1.70217	0.0841012	2.23718	1.08571	29.7103	0.483471	0.944052	19.2288	406.965
	2017-12-01	7.381	7.36	855	2.85015	0.13155	0.737976	10.9124	44.7277	0.79371	1.35823	34.7255	719.063
	2018-01-01	7.3	7.57	887.4	0.0964229	0.0411194	1.93817	2.67217	39.6598	0.285534	0.391767	60.7551	317.099
	2018-02-01	7.41	8.86	875.7	0.218661	0.0333105	3.42617	2.19381	40.6421	0.246779	0.996268	54.7683	773.26
	2018-03-01	7.25	7.48	945.2	35.2056	0.0854085	8.08352	2.60813	41.6674	0.276659	1.12295	60.3688	804.601
	2018-04-01	7.48	8.73	740.4	0.931946	0.0364271	7.84974	2.73627	25.5931	0.204694	0.538011	41.4075	585.914
Notes：
"-" indicates the value was missing

## Sheet: Baiyan River
Sample Id	Date	pH	DO	EC	Mn	Co	Al	Ni	Ba	V	Sb	Fe	Sr
	(m-d-y)		mg/L	μS/cm	μg/L	μg/L	μg/L	μg/L	μg/L	μg/L	μg/L	μg/L	μg/L
BR-10	2017-11-12	8.233	8.78	382	0.0539302	0.0494806	4.85053	0.812323	28.7355	0.601555	1.02339	17.7887	286.041
	2017-12-12	8.216	9.53	376	0.0804179	0.0463169	3.21267	0.639693	29.0187	0.587982	0.717736	18.058	287.387
	2018-01-10	7.9	10.45	366	0.08246	0.0518217	3.32829	0.563179	28.9109	0.530087	2.21786	20.6727	302.612
		-	-	-	-	-	-	-	-	-	-	-	-
	2018-03-10	8.02	10.06	385.4	1.59037	0.0737104	3.87858	0.814804	19.136	0.407535	0.7789	17.5223	272.449
	2018-04-10	7.77	9.67	373.8	0.773718	0.0270947	5.05729	0.377763	17.3552	0.284289	0.660345	10.69	167.45
BR-11	2017-11-11	8.202	8.71	373	0.131862	0.0443263	5.09223	0.660273	28.5615	0.626828	1.94719	15.3396	267.644
	2017-12-11	8.296	9.68	391	0.0578518	0.0468947	5.59962	0.720026	28.8598	0.630416	1.88624	17.7936	276.567
		-	-	-	-	-	-	-	-	-	-	-	-
	2018-02-11	8.08	10.56	377.4	0.0214931	0.0381971	6.46789	0.554625	28.8702	0.441241	0.885885	21.3244	291.285
	2018-03-11	8.05	9.94	391.3	0.373708	0.0696484	4.94051	0.503153	25.3317	0.413984	0.897861	19.4063	291.091
	2018-04-11	8.15	9.59	376.4	1.06945	0.0293963	4.00244	0.647162	17.6787	0.218049	0.546698	11.806	171.567
BR-12	2017-11-13	8.422	9	389	0.0582095	0.052249	4.7279	0.768762	26.814	0.583904	4.02998	19.2905	302.423
	2017-12-16	8.418	10.04	392	0.0665816	0.052119	4.48424	0.675568	27.8698	0.552033	5.56921	19.9831	309.811
	2018-01-12	8.1	10.12	378.4	0.0345492	0.0382021	8.69491	0.681491	25.554	0.219038	1.57839	19.9459	290.315
	2018-02-12	7.86	10.04	387	0.00465173	0.0429712	5.2132	1.96194	26.7205	0.421645	1.03306	21.0204	297.649
	2018-03-12	8.18	9.64	401.1	0.220173	0.0565842	10.473	1.2059	19.0131	0.335068	0.78719	15.2706	255.884
	2018-04-12	8.05	9.07	399.1	0.266142	0.0599095	13.4814	0.929467	24.4632	0.363884	0.913082	16.9084	295.785
BR-13	2017-11-16	8.339	8.89	418	0.0886057	0.058697	6.73772	0.927933	29.3579	0.55585	4.12562	21.9769	355.241
	2017-12-14	8.266	10.21	403	0.508842	0.060823	3.55989	0.732078	29.9786	0.479414	10.5273	20.5392	313.27
	2018-01-13	8.29	10.8	402.5	0.0412718	0.0521481	5.395	0.692792	27.1131	0.34892	1.37817	19.5773	312.376
	2018-02-13	8.13	10.85	396.8	0.0453515	0.0532459	6.97257	0.716052	28.6101	0.364426	0.936575	21.9227	317.658
	2018-03-14	7.45	10.4	409.8	0.431052	0.0721905	5.87301	1.1378	21.2791	0.33048	1.10667	19.3636	317.41
	2018-04-14	6.74	0.97	898	1.76332	0.151051	1.12901	1.40673	63.5333	1.07373	0.81563	43.5869	683.627
BR-14	2017-11-15	7.111	0.53	1047	0.318667	0.122178	1.77876	1.70965	91.9162	0.973834	18.1327	52.0673	717.924
	2017-12-15	7.045	0.48	1048	0.0962196	0.119288	1.00242	1.62118	95.0107	0.986645	9.7609	51.4807	723.622
	2018-01-14	7.05	0.42	971.6	0.997249	0.135229	1.71592	1.46692	83.7874	1.13517	0.292251	46.8304	708.972
	2018-02-14	6.99	0.9	954.1	3.07238	0.137986	1.50742	1.36547	83.4229	1.15277	0.953048	47.9096	637.684
	2018-03-15	6.94	0.48	916.4	10.5653	0.158093	1.89103	1.45464	70.7057	1.11989	1.45359	45.2455	694.961
	2018-04-15	8.04	10.14	397.5	0.625313	0.0650421	9.32739	0.802839	25.4807	0.348059	0.623767	19.6801	320.076
BR-15	2017-11-14	8.275	8.96	452	0.109607	0.0582846	4.63246	0.83739	30.2818	0.585952	7.92887	20.1906	340.876
	2017-12-13	8.157	10.1	426	0.15261	0.0431134	3.5118	0.545911	25.1871	0.388063	3.89773	16.3468	260.94
	2018-01-15	7.94	10.6	433.9	0.0530994	0.0519045	5.61326	0.780874	30.9186	0.438431	1.30094	21.1316	339.221
		-	-	-	-	-	-	-	-	-	-	-	-
	2018-03-13	7.64	10.16	436.5	0.364105	0.0570015	4.77503	2.0693	23.1049	0.283064	0.878165	14.5481	250.598
	2018-04-13	7.99	10.02	414.2	0.777759	0.047743	6.32017	1.75454	20.0596	0.246758	0.409244	14.692	238.62
Notes：
"-" indicates the value was missing

## Sheet: Jinzhong River
Sample Id	Date	pH	DO	EC	Mn	Co	Al	Ni	Ba	V	Sb	Fe	Sr
	(m-d-y)		mg/L	μS/cm	μg/L	μg/L	μg/L	μg/L	μg/L	μg/L	μg/L	μg/L	μg/L
JR-16	2017-11-17	7.764	7	411	0.0761216	0.0455077	3.66439	0.585591	38.8159	0.361049	4.41385	18.0036	391.049
	2017-12-17	7.98	8.42	413	0.0684943	0.050764	3.8168	0.366294	42.9895	0.422565	1.50035	17.8764	397.055
	2018-01-16	7.76	8.78	399.5	0.0463153	0.0486064	3.70469	0.418791	31.1528	0.322702	1.32125	17.1694	358.579
	2018-02-16	7.48	7.66	406.9	0.0624698	0.0402088	3.26494	0.6091	32.8714	0.440987	1.16632	19.4904	359.571
	2018-03-16	7.97	8.68	362.4	0.430279	0.0663824	11.3899	0.499353	24.3874	0.608611	1.12117	15.6248	312.906
	2018-04-16	7.55	6.38	374.4	0.46362	0.025221	6.26547	0.367751	31.236	0.296446	0.446154	9.50486	178.486
JR-17	2017-11-18	7.991	5.93	763	0.0820885	0.172515	1.94022	2.56679	50.1903	1.65937	7.18409	31.7412	757.988
	2017-12-18	8.279	8.57	723	0.130304	0.38665	4.45697	2.82091	67.9393	2.51598	2.11269	43.1478	430.246
	2018-01-17	7.82	6.16	700.8	0.464202	0.228651	10.1445	1.06231	43.2656	1.32554	1.48986	28.9409	794.363
	2018-02-17	7.94	8.1	664.1	2.50316	0.218405	10.1235	1.92186	43.8931	1.30253	1.3315	36.797	790.539
	2018-03-17	7.79	6.88	672.2	0.291181	0.230968	9.38695	1.11803	43.1622	1.28286	0.890542	33.307	343.223
	2018-04-17	8.06	8.62	703.9	1.0154	0.247181	9.22719	1.33594	44.1127	1.42687	0.544757	33.7332	900.332
JR-18	2017-11-19	8.235	8.6	709	0.170803	0.163656	5.05745	1.93373	47.3913	1.52352	17.2937	33.1375	476.398
	2017-12-19	8.638	8.77	691	0.0978506	0.425662	8.26645	2.09842	54.1727	3.02349	2.55913	47.3591	463.334
	2018-01-18	7.82	9.38	676.1	0.269945	0.238146	13.8899	1.14921	41.658	1.44712	1.39834	36.58	770.942
	2018-02-18	8.06	9.82	637.3	0.435704	0.201648	4.11783	1.40683	37.1184	1.88026	1.22785	28.6568	631.931
	2018-03-18	7.8	10.11	692	3.07117	0.292504	13.3529	1.29933	42.3774	1.49348	0.989154	35.0763	868.742
	2018-04-18	8	8.73	706.8	0.577731	0.231487	10.9909	4.92014	37.9882	1.94538	0.513306	32.2554	814.099
